# Supplementary material
Source: PubMed Central journal article supplement (PMC3290734)
Supplement: NIHMS334602-supplement-01.pdf [file NIHMS334602-supplement-01.pdf]

# APPENDIX 1

|                                     |              |
|-------------------------------------|--------------|
| <b>To Be Completed by the NURSE</b> |              |
| Code:                               | Interviewer: |

**READ:**

- In the next few years, more HIV vaccine studies will be started, with the hope of coming up with an HIV vaccine that works.
- The people who participate in these studies receive either a vaccine or a placebo. A placebo is a substance that can't hurt you, but can't prevent HIV either.
- The vaccine or the placebo can produce the same side effects, such as a sore arm, fever, or headache, that could last for a few days.
- People who get the vaccine will be chosen at random, like flipping a coin, and no one will know who got the vaccine and who got the placebo until after the study is over.
- Participants in vaccine studies will get counselling and tests for HIV infection about every 3 to 6 months.
- They will also be asked not to have an HIV test anywhere except at the vaccine study office. This is because the vaccine could cause a false HIV-positive test.
- Study participants might face discrimination. For example, if they tell others they are in an HIV vaccine study, people might think they are infected with HIV or have AIDS.
- Vaccine study staff are available to help vaccine study participants obtain access to health care and make sure their HIV test is accurate and up-to-date.

**SQ0:** If an HIV vaccine study were available, would you be willing to participate in it?

- Definitely Not   
  Probably Not   
  Don't Know   
  Probably   
  Definitely

**SQ1:** If you were in a vaccine study, how certain are you that you could do each of the following?  
 Please rate your level of confidence by recording in each space a number from 0 to 100 using the scale below.

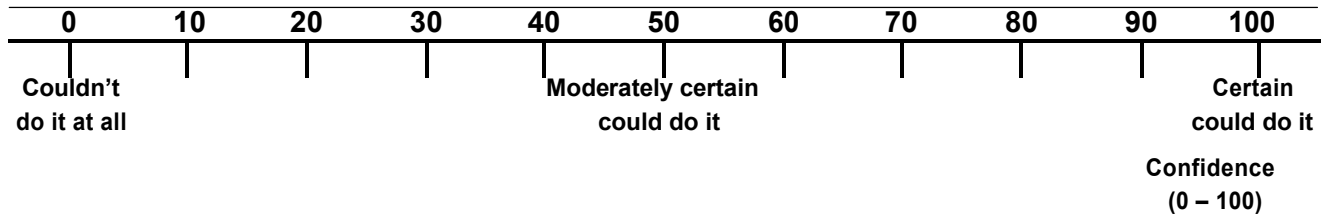

|                                                                                                                                 |  |
|---------------------------------------------------------------------------------------------------------------------------------|--|
| a. Remember to keep appointments for the time of each vaccination, which may be frequent for the first several months.          |  |
| b. Remember to keep all appointments for the rest of the study, which may be every three months, and up to four years in total. |  |
| c. Remember to also take HAART medications if HIV-positive.                                                                     |  |
| d. Remember not to obtain HIV antibody tests outside of the study.                                                              |  |
| e. Take the vaccine when using intravenous drugs.                                                                               |  |

**SQ2:** Please identify the following statements as either “true”, “false”, or “I don’t know”.

1. An HIV vaccine could weaken the immune system’s ability to fight off HIV infection.  
 True       False       I don’t know
  
2. Only vaccines that are known to be at least 50% effective at preventing HIV will be tested.  
 True       False       I don’t know
  
3. The vaccine will have no effect on a participant’s HIV test results.  
 True       False       I don’t know
  
4. If people test HIV-positive after the vaccine, they may really be infected with HIV, or they may just be having a reaction to the vaccine.  
 True       False       I don’t know
  
5. People in these studies will receive health care for any medical problems they have.  
 True       False       I don’t know
  
6. People in a vaccine study will know whether or not they got the placebo because only the vaccine will cause side effects.  
 True       False       I don’t know
  
7. Once a large-scale HIV vaccine trial begins, we can be sure the vaccine is completely safe.  
 True       False       I don’t know
  
8. People in these studies are guaranteed to be in any future vaccine studies.  
 True       False       I don’t know
  
9. The study nurse will decide who gets the real vaccine and who gets placebo.  
 True       False       I don’t know
  
10. Some participants will get the real vaccine and some will get a placebo.  
 True       False       I don’t know

*Adapted and used with permission from Koblin et al. Readiness for HIV vaccine trials: changes in willingness and knowledge among high-risk populations in the HIV Network for Prevention Trials. J Acquir Immune Defic Syndr 2000; 24(5): 451-7.*

(ACCESS Nurse’s Supplemental Questionnaire (version 2007/12/20; approved 2008/01/06)
